# Supplementary material
Source: publisher site journal article supplement (https://www.kjim.org/upload/media/kjim-2024-034-Supplementary-Table-4.pdf)
Supplement: Supplementary file 1 [file kjim-2024-034-Supplementary-Table-4.pdf]

**Supplementary Table 4. Variables and definitions**

| Category                       | Variable                                     | Definitions and remarks                                                                                                                                                                           |
|--------------------------------|----------------------------------------------|---------------------------------------------------------------------------------------------------------------------------------------------------------------------------------------------------|
| COPD characteristics           | Time since diagnosis                         | · At baseline                                                                                                                                                                                     |
|                                | Asthma, current or prior diagnosis           | · If applicable                                                                                                                                                                                   |
|                                | Spirometry results                           | · FEV1; FVC; FEV1/FVC                                                                                                                                                                             |
|                                | COPD severity classification                 | · GOLD 2017 classification (A, B, C or D)                                                                                                                                                         |
| Treatment patterns over 1 year | COPD medications prescribed at each visit    | · COPD medications were recorded every 6-months by research nurse, based on the prescriptions of pulmonology specialists<br>· The use of ICS and use of triple therapy were described as "Yes/No" |
|                                | Duration of COPD treatments                  | · NA                                                                                                                                                                                              |
|                                | Treatment modifications at or between visits | · Discontinuation/no further treatment, treatment switch, augmentation with another treatment) were indicated<br>· Start and end date of new treatments (if any) were indicated                   |

COPD, chronic obstructive pulmonary disorder; FEV1, forced expiratory volume (1 second); FVC, forced vital capacity; GOLD, Global Initiative for Chronic Obstructive Lung Disease; ICS, inhaled corticosteroid; NA, not applicable.
